# Supplementary material for: Socioeconomic differences in participation and diagnostic yield within the Dutch national colorectal cancer screening programme with faecal immunochemical testing
Source: PubMed Central journal article supplement (PMC8853540; doi:10.1371/journal.pone.0264067), 2022-02-17
Supplement: pone.0264067.s001.pdf [file pone.0264067.s001.pdf]

## Appendix 1

Sensitivity analyses of all outcomes with deciles instead of deciles

**Table 1: Descriptive of the number, age and gender distribution of the invitees in each decile. Decile 1 least deprived, Decile 5 most deprived.**

|              |         |        | Gender |         | Age median |
|--------------|---------|--------|--------|---------|------------|
|              | Number  | %      | Males  | %       |            |
| Decile 1     | 152290  | 8.2%   | 75653  | 49.7%   | 65.7       |
| Decile 2     | 181943  | 9.8%   | 90360  | 49.7%   | 65.7       |
| Decile 3     | 187725  | 10.1%  | 93555  | 49.8%   | 65.7       |
| Decile 4     | 193619  | 10.4%  | 96374  | 49.8%   | 65.9       |
| Decile 5     | 201600  | 10.8%  | 99731  | 49.5%   | 66.0       |
| Decile 6     | 202307  | 10.8%  | 100046 | 49.5%   | 65.9       |
| Decile 7     | 200609  | 10.8%  | 99064  | 49.4%   | 65.9       |
| Decile 8     | 188055  | 10.1%  | 92277  | 49.1%   | 66.7       |
| Decile 9     | 189994  | 10.2%  | 91373  | 48.1%   | 66.8       |
| Decile 10    | 167918  | 9.0%   | 80849  | 48.1%   | 66.8       |
| <b>Total</b> | 1866060 | 100.0% | 919282 | 49.3%   | 65.9       |
|              |         |        |        | p<0.001 | p<0.001    |

**Table 2: The participation to FIT, positivity rate and colonoscopy uptake after a positive FIT in each decile, with the univariate and multivariate odds ratio (OR) and 95% CI.**

| Decile    | N      | Attendance to FIT | OR (univariate) | OR (multivariate)* | 95% CI      |
|-----------|--------|-------------------|-----------------|--------------------|-------------|
| Decile 1  | 110528 | 72.6%             | 1               | 1                  | p<0.0001    |
| Decile 2  | 136330 | 74.9%             | 1.13            | 1.13               | 1.11 - 1.15 |
| Decile 3  | 141021 | 75.1%             | 1.14            | 1.14               | 1.13 - 1.16 |
| Decile 4  | 145506 | 75.2%             | 1.14            | 1.15               | 1.13 - 1.17 |
| Decile 5  | 151628 | 75.2%             | 1.15            | 1.15               | 1.14 - 1.17 |
| Decile 6  | 151505 | 74.9%             | 1.13            | 1.13               | 1.12 - 1.15 |
| Decile 7  | 147844 | 73.7%             | 1.06            | 1.07               | 1.05 - 1.08 |
| Decile 8  | 135796 | 72.2%             | 0.98            | 0.99               | 0.98 - 1.01 |
| Decile 9  | 131945 | 69.4%             | 0.86            | 0.87               | 0.86 - 0.88 |
| Decile 10 | 108000 | 64.3%             | 0.68            | 0.69               | 0.68 - 0.70 |

  

| Decile    | N    | Positivity rate | OR (univariate) | OR (multivariate)* | 95% CI      |
|-----------|------|-----------------|-----------------|--------------------|-------------|
| Decile 1  | 6398 | 5.8%            | 1               | 1                  | p<0.0001    |
| Decile 2  | 8068 | 5.9%            | 1.02            | 1.02               | 0.99 - 1.06 |
| Decile 3  | 8674 | 6.1%            | 1.07            | 1.06               | 1.03 - 1.10 |
| Decile 4  | 9052 | 6.2%            | 1.08            | 1.07               | 1.04 - 1.11 |
| Decile 5  | 9559 | 6.3%            | 1.10            | 1.09               | 1.05 - 1.12 |
| Decile 6  | 9676 | 6.4%            | 1.11            | 1.10               | 1.07 - 1.14 |
| Decile 7  | 9654 | 6.5%            | 1.14            | 1.13               | 1.09 - 1.16 |
| Decile 8  | 9383 | 6.9%            | 1.21            | 1.19               | 1.15 - 1.23 |
| Decile 9  | 9173 | 6.9%            | 1.22            | 1.20               | 1.16 - 1.24 |
| Decile 10 | 7972 | 7.3%            | 1.30            | 1.28               | 1.24 - 1.33 |

  

| Decile    | N    | Attendance to diagnostic colonoscopy | OR (univariate) | OR (multivariate)* | 95% CI      |
|-----------|------|--------------------------------------|-----------------|--------------------|-------------|
| Decile 1  | 5155 | 80.6%                                | 1               | 1                  | p<0.0001    |
| Decile 2  | 6613 | 82.0%                                | 1.10            | 1.10               | 1.01 - 1.19 |
| Decile 3  | 7172 | 82.7%                                | 1.15            | 1.15               | 1.06 - 1.25 |
| Decile 4  | 7440 | 82.2%                                | 1.11            | 1.12               | 1.03 - 1.21 |
| Decile 5  | 7862 | 82.2%                                | 1.12            | 1.12               | 1.04 - 1.22 |
| Decile 6  | 7870 | 81.3%                                | 1.05            | 1.06               | 0.98 - 1.15 |
| Decile 7  | 7830 | 81.1%                                | 1.04            | 1.04               | 0.96 - 1.13 |
| Decile 8  | 7404 | 78.9%                                | 0.90            | 0.91               | 0.84 - 0.99 |
| Decile 9  | 7068 | 77.1%                                | 0.81            | 0.82               | 0.76 - 0.89 |
| Decile 10 | 5924 | 74.3%                                | 0.70            | 0.71               | 0.65 - 0.77 |

\* The multivariate OR is corrected for age and gender.

**Table 3: The positive predictive value (PPV) of FIT for advanced neoplasia (AN) and colorectal cancer (CRC) in each SES decile, with the univariate and multivariate odds ratio (OR) and 95% CI.**

|           | N    | PPV AN* | OR (univariate) | OR (multivariate)** | 95% CI      |
|-----------|------|---------|-----------------|---------------------|-------------|
| Decile 1  | 2863 | 55.5%   | 1               | 1                   | p<0.001     |
| Decile 2  | 3826 | 57.9%   | 1.10            | 1.10                | 1.02 - 1.18 |
| Decile 3  | 4125 | 57.5%   | 1.08            | 1.08                | 1.00 - 1.16 |
| Decile 4  | 4263 | 57.3%   | 1.07            | 1.07                | 1.00 - 1.15 |
| Decile 5  | 4613 | 58.7%   | 1.14            | 1.13                | 1.06 - 1.22 |
| Decile 6  | 4578 | 58.2%   | 1.11            | 1.11                | 1.03 - 1.19 |
| Decile 7  | 4608 | 58.9%   | 1.14            | 1.15                | 1.07 - 1.23 |
| Decile 8  | 4264 | 57.6%   | 1.09            | 1.09                | 1.01 - 1.17 |
| Decile 9  | 4024 | 56.9%   | 1.06            | 1.06                | 0.99 - 1.14 |
| Decile 10 | 3271 | 55.2%   | 0.99            | 1.00                | 0.92 - 1.07 |

  

|           | N   | PPV CRC* | OR (univariate) | OR (multivariate)** | 95% CI      |
|-----------|-----|----------|-----------------|---------------------|-------------|
| Decile 1  | 481 | 9.3%     | 1               | 1                   | p=0.04      |
| Decile 2  | 622 | 9.4%     | 1.01            | 1.01                | 0.89 - 1.14 |
| Decile 3  | 673 | 9.4%     | 1.01            | 1.00                | 0.89 - 1.14 |
| Decile 4  | 703 | 9.4%     | 1.01            | 1.01                | 0.89 - 1.14 |
| Decile 5  | 759 | 9.7%     | 1.04            | 1.03                | 0.91 - 1.16 |
| Decile 6  | 757 | 9.6%     | 1.03            | 1.03                | 0.91 - 1.16 |
| Decile 7  | 683 | 8.7%     | 0.93            | 0.92                | 0.82 - 1.04 |
| Decile 8  | 618 | 8.3%     | 0.88            | 0.87                | 0.77 - 0.99 |
| Decile 9  | 655 | 9.3%     | 0.99            | 0.98                | 0.86 - 1.11 |
| Decile 10 | 510 | 8.6%     | 0.92            | 0.90                | 0.79 - 1.03 |

\*An advanced adenoma was defined as any adenoma with histology showing  $\geq 25\%$  villous component or high-grade dysplasia or with size  $\geq 10$  mm. The PPV was calculated as the number of persons with an advanced adenoma or with a CRC (together called advanced neoplasia (AN)) divided by the number of persons who underwent a colonoscopy after a positive FIT.

\*\*The multivariate OR is corrected for age and gender.

**Table 4: The detection rate (DR) per 100 participants uncorrected and corrected for colonoscopy uptake and the yield per 100 invitees of advanced neoplasia (AN) and colorectal cancer (CRC) for each decile, with the univariate and multivariate odds ratio (OR) and 95% CI.**

|           |      | DR PER PARTICIPANT |                   |                 |                       |             | YIELD PER INVITEE |                 |                       |             |
|-----------|------|--------------------|-------------------|-----------------|-----------------------|-------------|-------------------|-----------------|-----------------------|-------------|
|           | N    | DR AN uncorrected* | DR AN corrected** | OR (univariate) | OR (multi-variate)*** | 95% CI      | yield AN          | OR (univariate) | OR (multi-variate)*** | 95% CI      |
| Decile 1  | 2863 | 2.59%              | 3.21%             | 1               | 1                     | p<0.01      | 1.88%             | 1               | 1                     | p<0.0001    |
| Decile 2  | 3826 | 2.81%              | 3.42%             | 1.09            | 1.07                  | 1.02 - 1.11 | 2.10%             | 1.12            | 1.12                  | 1.07 - 1.17 |
| Decile 3  | 4125 | 2.93%              | 3.53%             | 1.14            | 1.10                  | 1.06 - 1.15 | 2.20%             | 1.17            | 1.17                  | 1.11 - 1.22 |
| Decile 4  | 4263 | 2.93%              | 3.56%             | 1.14            | 1.11                  | 1.07 - 1.16 | 2.20%             | 1.18            | 1.17                  | 1.12 - 1.23 |
| Decile 5  | 4613 | 3.04%              | 3.70%             | 1.18            | 1.16                  | 1.12 - 1.20 | 2.29%             | 1.22            | 1.21                  | 1.16 - 1.27 |
| Decile 6  | 4578 | 3.02%              | 3.71%             | 1.18            | 1.16                  | 1.12 - 1.20 | 2.26%             | 1.21            | 1.21                  | 1.15 - 1.26 |
| Decile 7  | 4608 | 3.12%              | 3.84%             | 1.21            | 1.20                  | 1.16 - 1.25 | 2.30%             | 1.23            | 1.22                  | 1.16 - 1.28 |
| Decile 8  | 4264 | 3.14%              | 3.98%             | 1.22            | 1.25                  | 1.21 - 1.29 | 2.27%             | 1.21            | 1.19                  | 1.14 - 1.25 |
| Decile 9  | 4024 | 3.05%              | 3.96%             | 1.18            | 1.24                  | 1.20 - 1.29 | 2.12%             | 1.12            | 1.11                  | 1.06 - 1.17 |
| Decile 10 | 3271 | 3.03%              | 4.08%             | 1.16            | 1.28                  | 1.24 - 1.33 | 1.95%             | 1.02            | 1.01                  | 0.96 - 1.06 |
|           | N    | DR CRC*            | DR CRC**          | OR (univariate) | OR (multi-variate)*** | 95% CI      | yield CRC         | OR (univariate) | OR (multi-variate)*** | 95% CI      |
| Decile 1  | 481  | 0.44%              | 0.54%             | 1               | 1                     | p<0.01      | 0.32%             | 1               | 1                     | p<0.001     |
| Decile 2  | 622  | 0.46%              | 0.56%             | 1.05            | 1.03                  | 0.95 - 1.11 | 0.34%             | 1.08            | 1.08                  | 0.96 - 1.22 |
| Decile 3  | 673  | 0.48%              | 0.58%             | 1.10            | 1.07                  | 0.99 - 1.15 | 0.36%             | 1.14            | 1.13                  | 1.01 - 1.27 |
| Decile 4  | 703  | 0.48%              | 0.59%             | 1.11            | 1.09                  | 1.01 - 1.16 | 0.36%             | 1.15            | 1.14                  | 1.01 - 1.28 |
| Decile 5  | 759  | 0.50%              | 0.61%             | 1.15            | 1.13                  | 1.05 - 1.20 | 0.38%             | 1.19            | 1.18                  | 1.05 - 1.32 |
| Decile 6  | 757  | 0.50%              | 0.62%             | 1.15            | 1.14                  | 1.07 - 1.21 | 0.37%             | 1.19            | 1.17                  | 1.05 - 1.31 |
| Decile 7  | 683  | 0.46%              | 0.57%             | 1.06            | 1.05                  | 0.98 - 1.13 | 0.34%             | 1.08            | 1.06                  | 0.95 - 1.20 |
| Decile 8  | 618  | 0.46%              | 0.58%             | 1.05            | 1.07                  | 0.99 - 1.15 | 0.33%             | 1.04            | 1.02                  | 0.91 - 1.15 |
| Decile 9  | 655  | 0.50%              | 0.65%             | 1.14            | 1.19                  | 1.12 - 1.27 | 0.34%             | 1.09            | 1.07                  | 0.95 - 1.20 |
| Decile 10 | 510  | 0.47%              | 0.64%             | 1.09            | 1.18                  | 1.10 - 1.26 | 0.30%             | 0.96            | 0.94                  | 0.83 - 1.06 |

\*An advanced adenoma was defined as any adenoma with histology showing  $\geq 25\%$  villous component or high-grade dysplasia or with size  $\geq 10$  mm. The detection rate was defined as the number of persons with advanced adenomas or with CRC (together called advanced neoplasia (AN)) detected during colonoscopy divided by the number of screened persons with an assessable stool sample.

\*\*The detection rate was corrected for the differences in colonoscopy uptake compared to decile 1.

\*\*\*The multivariate OR is corrected for age and gender and in the analysis per participant we corrected the DR for non-compliance to colonoscopy using poststratification (assuming full compliance).
